# Supplementary material
Source: publisher site journal article supplement (https://www.dovepress.com/article/273185)
Supplement: Supplementary file 1 [file get_supplementary_file.php]

**Supplementary Materials**

**Table S1** Baseline characteristics of ACS patients who underwent CEA.

| Case number | Age | Sex | Education, years | Side, Stenosis% | Vascular risk factors |
| --- | --- | --- | --- | --- | --- |
| 1 | 69 a | M | 16 | R,90 | HTN, DM, S |
| 2 | 75 a | M | 9 | R,100 | HTN, S |
| 5 | 76 a | M | 9 | R,100 | HTN |
| 6 | 74 a | F | 12 | R,99 | HTN, D |
| 7 | 69 a | F | 6 | R,85 | HTN |
| 14 | 61 a | M | 16 | R,90 | HTN |
| 15 | 78 a | M | 9 | R,80 | IHD |
| 16 | 67 a | F | 9 | R,90 | HTN, S |
| 17 | 63 a | M | 9 | L,70 | HTN |
| 19 | 67 a | M | 6 | L,100 | HTN, DM, D |
| 22 | 73 a | F | 9 | L,90 | HTN, DM, IHD |
| 11 | 71 | M | 8 | R,99 | HTN, DM, S |
| 12 | 63 | M | 12 | R,90 | HTN, D |
| 20 | 77 | M | 6 | R,70 | HTN, DM, S |
| 8 | 83 | F | 12 | L,90 | HTN, DM, IHD |
| 9 | 70 | M | 9 | L,70 | HTN, DM, S |
| 10 | 60 | M | 16 | L,90 | HTN, DM, IHD |

a Patients who underwent follow-up study successfully.

ACS, asymptomatic carotid stenosis; CEA, carotid endarterectomy; F, female; M, male; R, right side; L, left side; HTN, hypertension; DM, diabetes mellitus; IHD, ischemic heart disease; S, smoking; D, Dyslipidemia.

**Table S2.** Baseline and follow-up cognitive evaluations of ACS patients who underwent CEA

| Cognitive assessment | Baseline (n=11) | After 6 months of CEA (n=11) | *p* value |
| --- | --- | --- | --- |
| Mini-Mental State Examination | 27.7±1.6 | 28.4±1.4 | 0.046 |
| Working memory (z score) | -0.1±0.9 | 0.1±0.9 | 0.021 |
| Processing speed (time, z score) | -0.5±0.8 | 0.5±0.8 | <0.001* |
| Verbal fluency (z score) | 0.5±0.6 | -0.5±0.7 | 0.023 |
| Executive function (time, z score) | -0.4±0.8 | 0.4±0.9 | 0.006* |

Wilcoxon signed-rank test. *Statistically significant after Bonferroni correction (*P*<0.01).

CEA, carotid endarterectomy.

**Table S3.** Volumes of thalamic subregions in baseline and follow-up

| Structure, mm3 | Baseline | After 6 months of CEA | Significance | |
| --- | --- | --- | --- | --- |
| (n=11) | (n=11) | t | *p* |
| Whole thalamus |  |  |  |  |
| Left | 5037±356 | 5200±343 | -1.701 | 0.120 |
| Right | 5052±783 | 4977±447 | 0.291 | 0.777 |
| Anteroventral (AV) |  |  |  |  |
| Left | 102±22 | 99±21 | 0.449 | 0.663 |
| Right | 107±25 | 106±21 | 0.187 | 0.855 |
| Later posterior (LP) |  |  |  |  |
| Left | 98±17 | 98±13 | -0.017 | 0.987 |
| Right | 85±22 | 89±14 | -0.664 | 0.522 |
| Centromedian (CM) |  |  |  |  |
| Left | 198±20 | 200±19 | -0.299 | 0.771 |
| Right | 191±38 | 188±20 | 0.423 | 0.681 |
| Mediodrosal (MD) |  |  |  |  |
| Left | 797±113 | 854±93 | -2.286 | 0.045 * |
| Right | 736±110 | 806±149 | -2.598 | 0.027* |
| Ventral lateral (VL) |  |  |  |  |
| Left | 1123±93 | 1139±112 | -0.614 | 0.553 |
| Right | 1078±187 | 1109±168 | -0.674 | 0.516 |
| Pulvinar (PU) |  |  |  |  |
| Left | 1287±171 | 1368±145 | -1.632 | 0.134 |
| Right | 1318±313 | 1281±205 | 0.590 | 0.568 |

Wilcoxon signed-rank test. * *p*<0.05.

CEA, carotid endarterectomy.

**Table S4.** Correlation of CIMT with morphometric abnormalities (both ipsilateral and contralateral side) in ACS patients

| Patients with ACS (n=29) | Ipsilateral side | | Contralateral side | |
| --- | --- | --- | --- | --- |
| r | p | r | p |
| Thalamic volume | -0.542 | 0.002* | -0.491 | 0.007* |
| Shape deformation of thalamus | -0.437 | 0.018* | -0.398 | 0.033* |
| Mediodorsal thalamic volume | -0.495 | 0.006* | -0.427 | 0.021* |

Spearman correlation analyses. * *p*<0.05.

ACS, asymptomatic carotid stenosis.

**Supplementary Figure 1.** Flowchart of participants

**
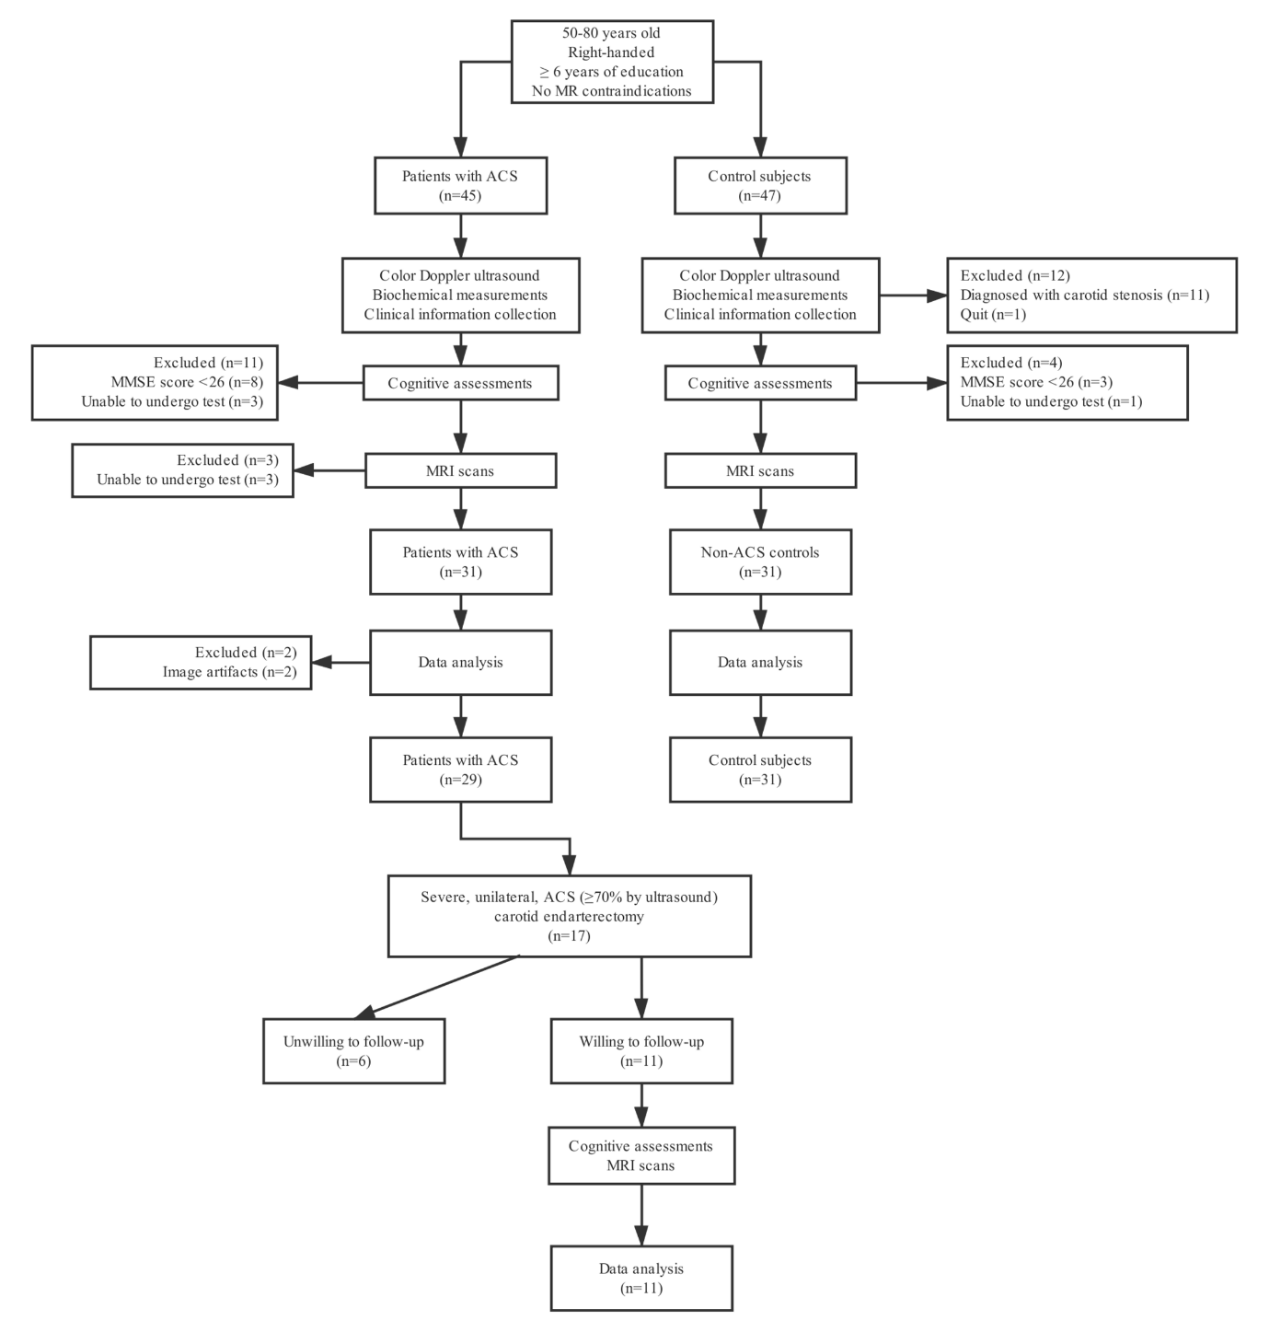
**
